# Supplementary material for: CRISPR/Cas9-Mediated Mutagenesis of Abdominal-A and Ultrabithorax in the Asian Corn Borer, Ostrinia furnacalis
Source: MDPI journal article supplement (doi:10.3390/insects13040384), 2022-04-13
Supplement: s1 [file s1]

Table S1. Primers used in this study.

| Primer name | Primer sequence(5'-3')                 | Primer purpose                                |
|-------------|----------------------------------------|-----------------------------------------------|
| Abd-A-sgF1  | TAATACGACTCACTATAGGGGTCGGCAAACCTACACG  | Preparation of sgRNA                          |
|             | GTTTATAGAGCTAGAAATAGCAAGTTAAAATAAG     | templates                                     |
| Ubx-sgF1    | TAATACGACTCACTATAGGTTATGGAGGGAAAGAATG  | Preparation of sgRNA                          |
|             | GTTTATAGAGCTAGAAATAGCAAGTTAAAATAAG     | templates                                     |
| Ubx-sgF2    | TAATACGACTCACTATAGGGTAGAAGGTGTGGTTGGT  | Preparation of sgRNA                          |
|             | GTTTATAGAGCTAGAAATAGCAAGTTAAAATAAG     | templates                                     |
| GFP-sgF1    | TAATACGACTCACTATAGGGCGAGGAGCTGTTCACCG  | Preparation of sgRNA                          |
|             | GTTTATAGAGCTAGAAATAGCAAGTTAAAATAAG     | templates                                     |
| GFP-sgF2    | TAATACGACTCACTATAGGCCACAAGTTCAGCGTGTC  | Preparation of sgRNA                          |
|             | GTTTATAGAGCTAGAAATAGCAAGTTAAAATAAG     | templates                                     |
| sgRNA-R     | AAAAGCACCGACTCGGTGCCACTTTTTCAAGTTGATAA | Preparation of sgRNA                          |
|             | CGGACTAGCCTTATTTTAACTTGCTATTTCT        | templates                                     |
| Abd-A-F1    | TTCTCGCTGTTGAACTGCTT                   | Identification of somatic mutations           |
| Abd-A-R1    | TTACGTGGGGACTTTGTTCA                   | Identification of somatic mutations           |
| Ubx-F1      | ATGAACTCCTACTTTGAGCAGGGTG              | Identification of somatic mutations           |
| Ubx-R1      | CTTATTGGGCGCTCTCTTACAAGAC              | Identification of somatic mutations           |
| Abd-A-qF    | CGGCAAACCTACACGAGGTT                   | RT-qPCR for <i>Abdominal A</i>                |
| Abd-A-qR    | TCCTGCTCCTCTCTCTCTCG                   | gene ( <i>Abd-A</i> )                         |
| Ubx -qF     | CCACACCTTCTACCTTGGA                    | RT-qPCR for <i>Ultrabithorax</i>              |
| Ubx -qR     | TCATCCTCCGATTCTGGAAC                   | gene ( <i>Ubx</i> )                           |
| Lab-qF      | CAACCAGCAGAACGGTTACA                   | RT-qPCR for <i>Labial</i> gene                |
| Lab-qR      | CCCCATAGTCCAGATTCGTG                   | ( <i>Lab</i> )                                |
| Pb-qF       | GGCTAAGCGGATCAAACAAG                   | RT-qPCR for <i>Proboscipedia</i>              |
| Pb-qR       | TGGGTAGTGACCGAGAGGAC                   | gene ( <i>Pb</i> )                            |
| Dfd-qF      | ATTACCATCCGTTGCCTCAG                   | RT-qPCR for <i>Deformed</i> ( <i>Dfd</i> )    |
| Dfd-qR      | GGGCATGGAGTTTCTACCA                    | gene                                          |
| Scr-qF      | TGGAGCACAAAGCTAACGTG                   | RT-qPCR <i>Sex combs reduced</i>              |
| Scr-qR      | CATTCGCATTCACCGTACTC                   | ( <i>Scr</i> ) gene                           |
| Antp-qF     | AAGGATGCTCTGGACTCTGC                   | RT-qPCR for <i>Antennapedia</i>               |
| Antp-qR     | TATCTTCCGTCGCAGCTTCT                   | ( <i>Antp</i> ) gene                          |
| Abd-B-qF    | AGTGGTGGCGAGTACAAACC                   | RT-qPCR for <i>Abdominal B</i>                |
| Abd-B-qR    | CTGACTCGGGAGCGTAGTTT                   | ( <i>Abd-B</i> ) gene                         |
| Wnt1-qF     | ACGCCACACTGAGGAGAAAG                   | RT-qPCR for <i>Wingless</i>                   |
| Wnt1-qR     | AACGCTGTCTCTCGACAACC                   | <i>Integrated family member 1</i>             |
|             |                                        | ( <i>Wnt1</i> ) gene                          |
| Dll-Qf      | TATCCAACTCGGCAAATTCC                   | RT-qPCR for <i>Distal-less</i> ( <i>Dll</i> ) |
| Ddll-qR     | GGAAGGGGTACCCTAACGAC                   | gene                                          |

|                |                        |                                    |
|----------------|------------------------|------------------------------------|
| Sca-qF         | AGTACGTCCACGGATTGGA    | RT-qPCR for <i>Scabrous (Sca)</i>  |
| Sca-qR         | CTTGAAGCCACTCACGTTCA   | gene                               |
| Transcript-qF  | TTTATTGGCGATCCTGAACC   | RT-qPCR for <i>Transcript</i> gene |
| Transcript-qR  | GAATCCTCTCTGCCCAACTG   |                                    |
| Larp-qF        | GCCTCTCCGGTTCTACTCC    | RT-qPCR for <i>La-related</i>      |
| Larp-qR        | ACTTGTCGAGACACGCCTTT   | <i>protein (Larp)</i> gene         |
| Centrosomin-qF | GCTTAGCACTTCCGGTAGGA   | RT-qPCR for <i>Centrosomin</i>     |
| Centrosomin-qR | ACATCTGCTTGTGGGAAAGG   | gene                               |
| Dpp-qF         | ACGGCTACGACGCCTACTAC   | RT-qPCR for <i>decapentaplegic</i> |
| Dpp-qR         | GCACCACATTGTTCACTTCG   | ( <i>Dpp</i> ) gene                |
| Connectin-qF   | CCTTTTGAAGGTGTTTCGAG   | RT-qPCR for <i>Connectin</i> gene  |
| Connectin-qR   | TCGCTTTTCGATTCTGTTTCT  |                                    |
| Wnt4-qF        | GCGTAGGCAGTTTCGGTAAG   | RT-qPCR for <i>Wingless</i>        |
| Wnt4-qR        | CGTGACATTTGCACACTTCC   | <i>Integrated family member 4</i>  |
|                |                        | ( <i>Wnt4</i> ) gene               |
| B-tubulin-qF   | GCTGGTGGAGAACACAGACA   | RT-qPCR for <i>Beta-tubulin</i>    |
| B-tubulin -qR  | ATGTTGACTGCGAGCTTCTCT  | gene                               |
| Spalt-qF       | CACACCAAGGAACGACCTTT   | RT-qPCR for <i>Spalt</i> gene      |
| Spalt-qR       | GTCAGCATGTGCTGCTTCAT   |                                    |
| Knot-qF        | TTACACGGGGGACGATACAT   | RT-qPCR for <i>Knot</i> gene       |
| Knot-qR        | TAGCCCAGACATCAGACATGA  |                                    |
| Actin-qF       | CCGTCCTCTGACCGAGGCTC   | RT-qPCR for <i>Actin</i> gene      |
| Actin-qR       | GGTGTGGGAGACACCATCTCCG |                                    |

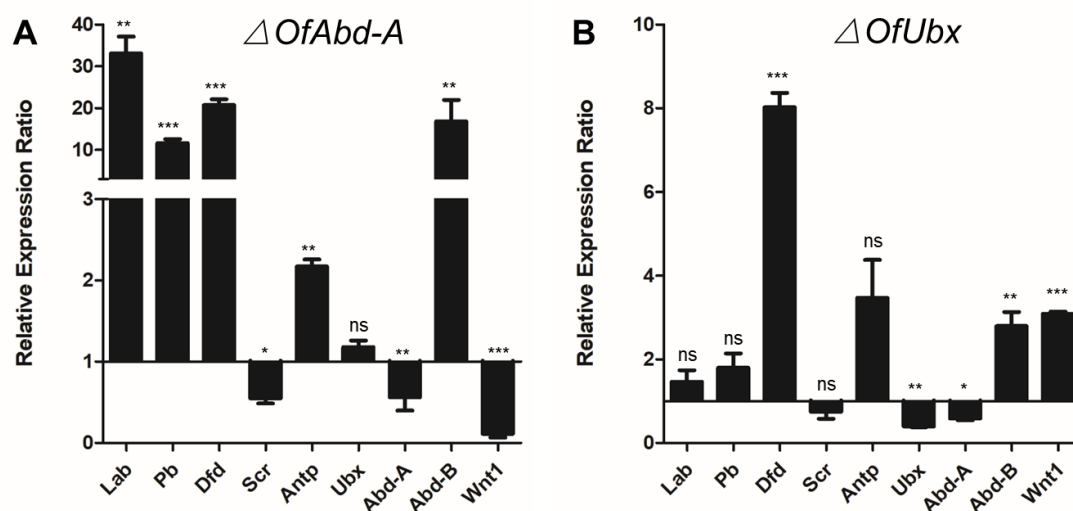

**Figure S1.** Relative transcript levels of downstream genes in *OfAbd-A* and *OfUbx* mutants. Transcript levels of indicated mRNAs in *OfAbd-A* (A) and *OfUbx* (B) mutants relative to wild-type levels. Three individual biological replicates of real-time PCR were performed. Asterisks (\*, \*\* or \*\*\*) indicate significant differences ( $P < 0.05$ ,  $P < 0.01$ ,  $P < 0.001$ ).

0.01 or  $P < 0.001$ , respectively) compared with wild type adults using a two-tailed t-test. ns represents no significant difference.

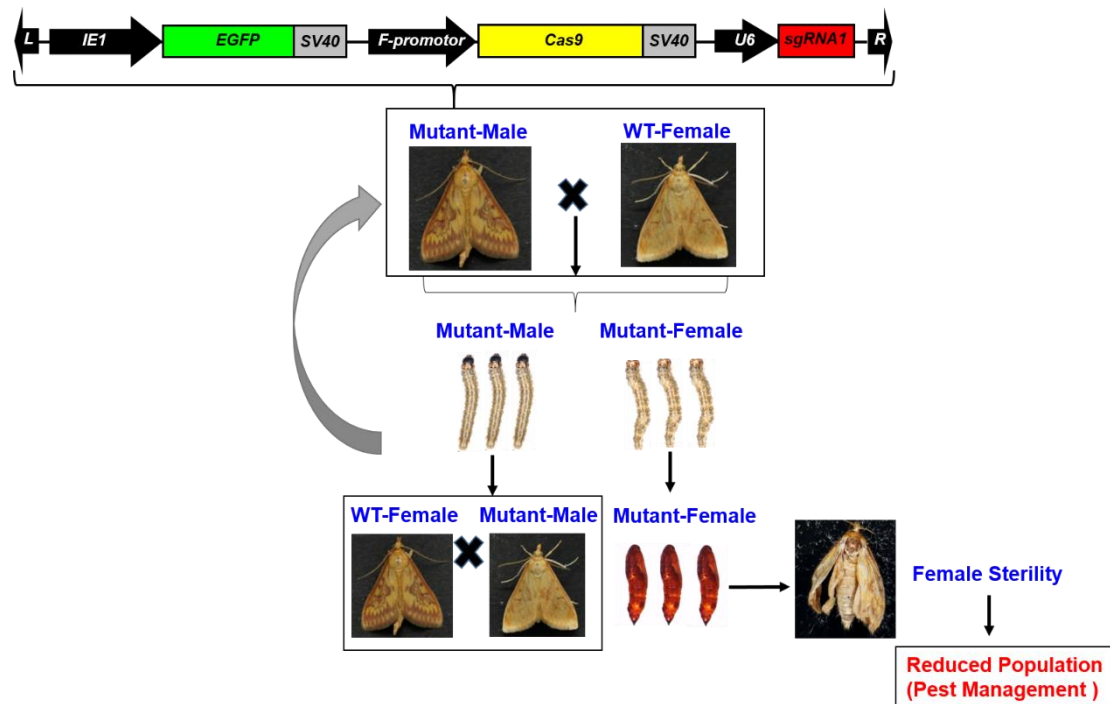

**Figure S2.** Prospective CRISPR/Cas9 mediated female specific transgenic pest control schematic.
